# Supplementary material
Source: HighWire-hosted journal article supplement (https://jnm.snmjournals.org/highwire/filestream/95083/field_highwire_adjunct_files/0/178434_Supplemental_Data.pdf)
Supplement: 178434_Supplemental_Data.pdf [file 178434_Supplemental_Data.pdf]

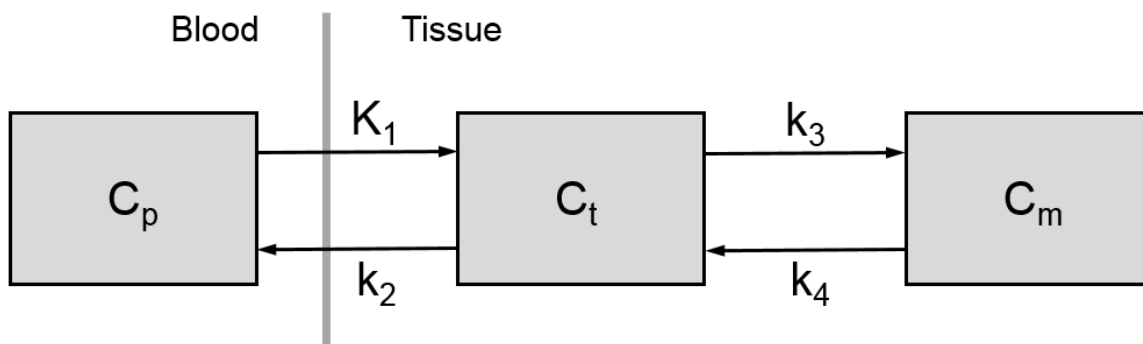

Supplemental Figure 1. Three compartment model with rate constants  $K_1$ ,  $k_2$ ,  $k_3$  and  $k_4$  describing transport between blood and two tissue compartments.  $C_p$  is the concentration of  $^{18}\text{F}$ -FLT in arterial plasma;  $C_t$  is the concentration in an exchangeable tissue compartment; and  $C_m$  is the concentration of metabolized  $^{18}\text{F}$ -FLT.  $K_1$  represents the rate of transfer from blood to tissue and is influenced by blood flow and the permeability of the blood brain barrier;  $k_2$  represents the rate of transfer of nonphosphorylated  $^{18}\text{F}$ -FLT from tissue back to blood;  $k_3$  represents the rate of phosphorylation of  $^{18}\text{F}$ -FLT;  $k_4$  represents potential loss of signal from the  $C_m$  compartment. Under the assumption that  $k_4$  is negligible, the influx constant  $K_i = K_1 \times k_3 / (k_2 + k_3)$  describes the overall uptake rate. Both  $K_i$  and  $k_3$  have been shown to be correlated with the in vitro proliferation index Ki-67.
